# Supplementary material for: Incorporation of apricot shell loads into novel highly ductile thermoplastic zein biopolymers through injection molding for food packaging
Source: Research Square preprint supplement (doi:10.21203/rs.3.rs-7427347/v1), 2025-09-08
Supplement: Supplementary file 1 [file 052192022c7972168c624607.docx]

**Incorporation of apricot shell loads into novel highly ductile thermoplastic zein biopolymers through injection molding for food packaging**

Jorge Israel Peñafiel-Alvarado1,2, Jaume Gomez-Caturla2*, Jan Novak3, Pavel Brdlík3, Rafael Balart2, Luis Quiles-Carrillo2

1 Pontificia Universidad Católica del Ecuador – Ibarra (PUCE - Ibarra), Av. Jorge Guzmán Rueda y Ave. Padre Aurelio Espinoza Polit, Ibarra 100112, Ecuador. J.I.P-A.: [jipenafiel@pucesi.edu.ec](mailto:jipenafiel@pucesi.edu.ec).

2 Instituto Universitario de Investigación de Tecnología de Materiales, Universitat Politècnica de València, IUITM-UPV, Alcoy, España. J.G-C.: [jaugoca@epsa.upv.es](mailto:jaugoca@epsa.upv.es); L.Q-C.: [luiquic1@epsa.upv.es](mailto:luiquic1@epsa.upv.es); R.B.: [rbalart@mcm.upv.es](mailto:rbalart@mcm.upv.es)

3 Faculty of Mechanical Engineering, Technical University of Liberec, Studentska 1402/2, 46117 Liberec, Czech Republic. J.N.: [jan.novak@tul.cz](mailto:jan.novak@tul.cz); P.B: [pavel.brdlik@tul.cz](mailto:pavel.brdlik@tul.cz)

*Corresponding author: [jaugoca@epsa.upv.es](mailto:jaugoca@epsa.upv.es)

**Supplementary Information**

**S.I.1. Fourier Transformed Infrared Spectroscopy (FTIR) of zein-DEG-ASF materials**

**Figure SI.1.** FTIR spectra for the thermoplastic zein-ASF materials.

**S.I.2. Thermomechanical analysis (TMA) of the zein-ASF thermoplastic materials.**

**Figure SI.2.** TMA thermograms of zein-ASF thermoplastic materials.

**S.I.3. X-ray diffraction patterns of zein-ASF thermoplastic materials.**

**Figure SI.3.** XRD diffractograms of zein-ASF thermoplastic materials.

**S.I.4. Visual aspect of zein-ASF materials after the water uptake test.**

**
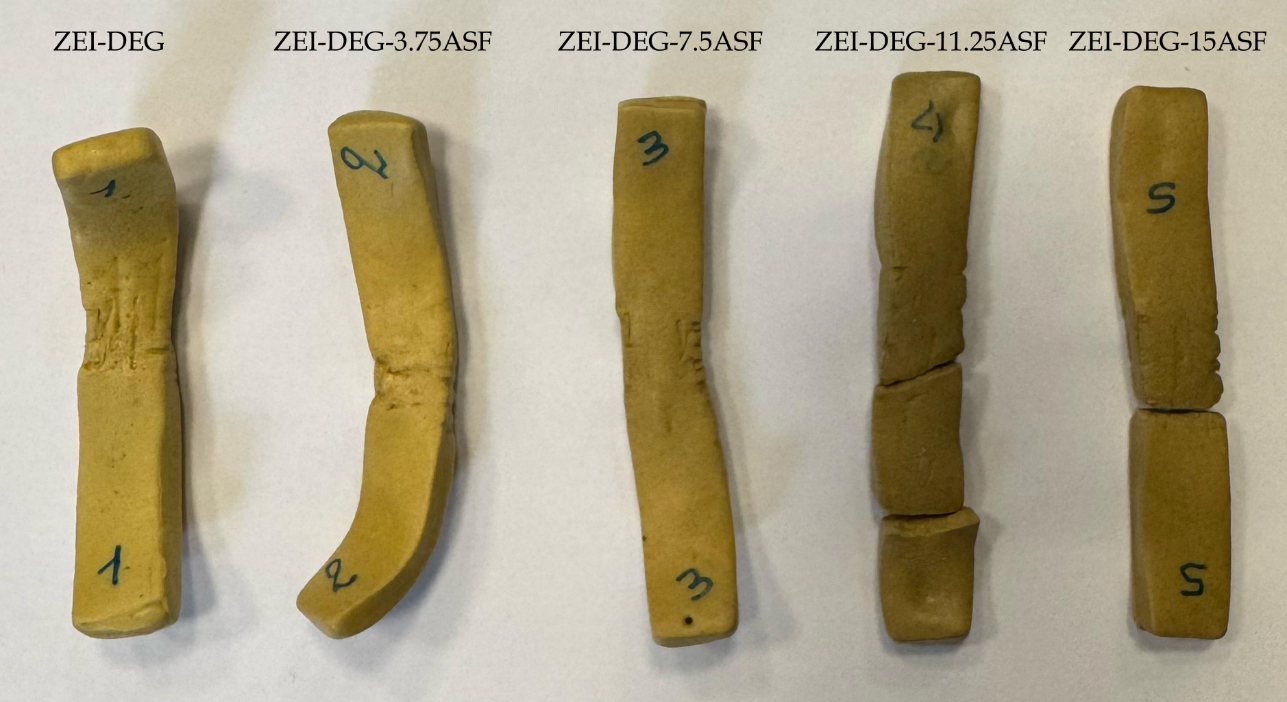
**

**Figure SI.4.** Visual aspect of zein-ASF materials after 5 weeks of immersion in distilled water.
